# Supplementary material for: Prevalence and Diagnostic Approach to Sleep Apnea in Hemodialysis Patients: A Population Study
Source: Hindawi journal article supplement (doi:10.1155/2015/103686), 2015-01-01
Supplement: f1 [file 103686.f1.pdf]

**Supplementary Table S1: characteristics of the derivation population and the validation population for the ANT-algorithm**

|                                 | <b>Derivation<br/>population</b> | <b>Validation<br/>population</b> | <b>p</b> |
|---------------------------------|----------------------------------|----------------------------------|----------|
| N                               | 57                               | 43                               |          |
| AHI (no./h) [median - IQR]      | 18.0 [6.0 - 35.0]                | 14.0 [8.0 - 30.0]                | 0.854    |
| OSA with AHI $\geq$ 15/h (N, %) | 33 (57.9)                        | 21 (48.8)                        | 0.421    |
| Age (y)                         | 58.2 (16.5)                      | 65.4 (11.8)                      | 0.016    |
| Male Sex (N, %)                 | 38 (66.7)                        | 25 (58.2)                        | 0.409    |
| Race (N, %)                     |                                  |                                  | 0.005    |
| Caucasian                       | 42 (70.0)                        | 42 (95.4)                        |          |
| Asian                           | 4 (6.7)                          | 0 (0)                            |          |
| African                         | 14 (23.3)                        | 2 (4.6)                          |          |
| BMI (kg/m <sup>2</sup> )        | 24.8 (4.0)                       | 27.7 (4.8)                       | 0.002    |
| Neck Circumference (cm)         | 40.0 (3.7)                       | 40.9 (5.1)                       | 0.323    |
| Time on RRT (y) [median - IQR]  | 3.3 [0.8 - 7.3]                  | 2.1 [0.9 – 3.8]                  | 0.228    |

Values are expressed as mean (SD), if not otherwise specified. IQR = interquartile range

AHI = apnea/hypopnea index; OSA= obstructive sleep apnea; BMI = body mass index; RRT = renal replacement therapy
